# Supplementary material
Source: HighWire-hosted journal article supplement (https://www.ghspjournal.org/highwire/filestream/1585/field_highwire_adjunct_files/0/15-00093-Gray-Supplemental-Table-B.docx)
Supplement: 15-00093-Gray-Supplemental-Table-B.docx [file 15-00093-Gray-Supplemental-Table-B.docx]

**SUPPLEMENTARY TABLE B.** Retention of Orphaned or Separated Children (OSC) in the Positive Outcomes for Orphans (POFO) Study Over 3 Years of Follow-Up

|  | **Baseline** | | **1 year** | | **2 years** | | **3 years** | |
| --- | --- | --- | --- | --- | --- | --- | --- | --- |
|  | **n** | **% of baseline** | **n** | **% of baseline** | **n** | **% of baseline** | **n** | **% of baseline** |
| Overall | 2837 | 100% | 2533 | 89% | 1989 | 70% | 2314 | 82% |
|  |  |  |  |  |  |  |  |  |
| Institution-based | 1357 | 100% | 1175 | 87% | 899 | 66% | 1020 | 75%a |
| Family-based | 1480 | 100% | 1358 | 92% | 1090 | 74% | 1294 | 87% |
|  |  |  |  |  |  |  |  |  |
| Male | 1539 | 100% | 1381 | 90% | 1112 | 72% | 1272 | 83% |
| Female | 1298 | 100% | 1152 | 89% | 877 | 68% | 1042 | 80% |
| a After accounting for institutions lost to the study, retention was >80%. | | | | | | | | |
